# Supplementary material
Source: MDPI journal article supplement (https://www.mdpi.com/2673-9992/14/1/48)

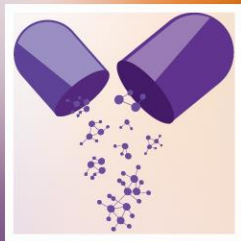

# The 8th International Electronic Conference on Medicinal Chemistry (ECMC 2022)

01-30 NOVEMBER 2022 | ONLINE

## Identification of new anti-SARS-CoV-2 agents through virtual screening of phytoconstituents extracted from Moroccan plants

Chaired by **DR. ALFREDO BERZAL-HERRANZ**;  
Co-Chaired by **PROF. DR. MARIA EMÍLIA SOUSA**

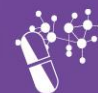

*pharmaceuticals*

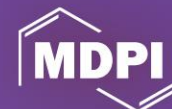

**Oussama ABCHIR**<sup>1</sup>, Hassan NOUR<sup>1</sup>, Ossama DAOUI<sup>2</sup>,  
Souad EL KHATTABI<sup>2</sup>, Samir CHTITA<sup>1,\*</sup>

<sup>1</sup> Laboratory of Analytical and Molecular Chemistry, Faculty of Sciences Ben M'Sik, Hassan II University of Casablanca, B. P 7955 Casablanca, Morocco

<sup>2</sup> Laboratory of Engineering, Systems and Applications, National School of Applied Sciences, Sidi Mohamed Ben Abdellah-Fez University, BP 72 Fez, Morocco.

\* Corresponding author: [Samirchtita@gmail.com](mailto:Samirchtita@gmail.com)

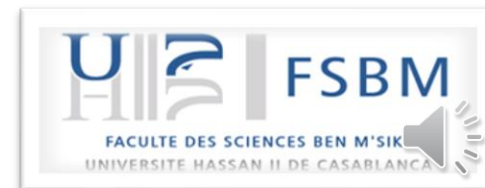

# Identification of new anti-SARS-CoV-2 agents through virtual screening of phytoconstituents extracted from Moroccan plants

## Graphical Abstract

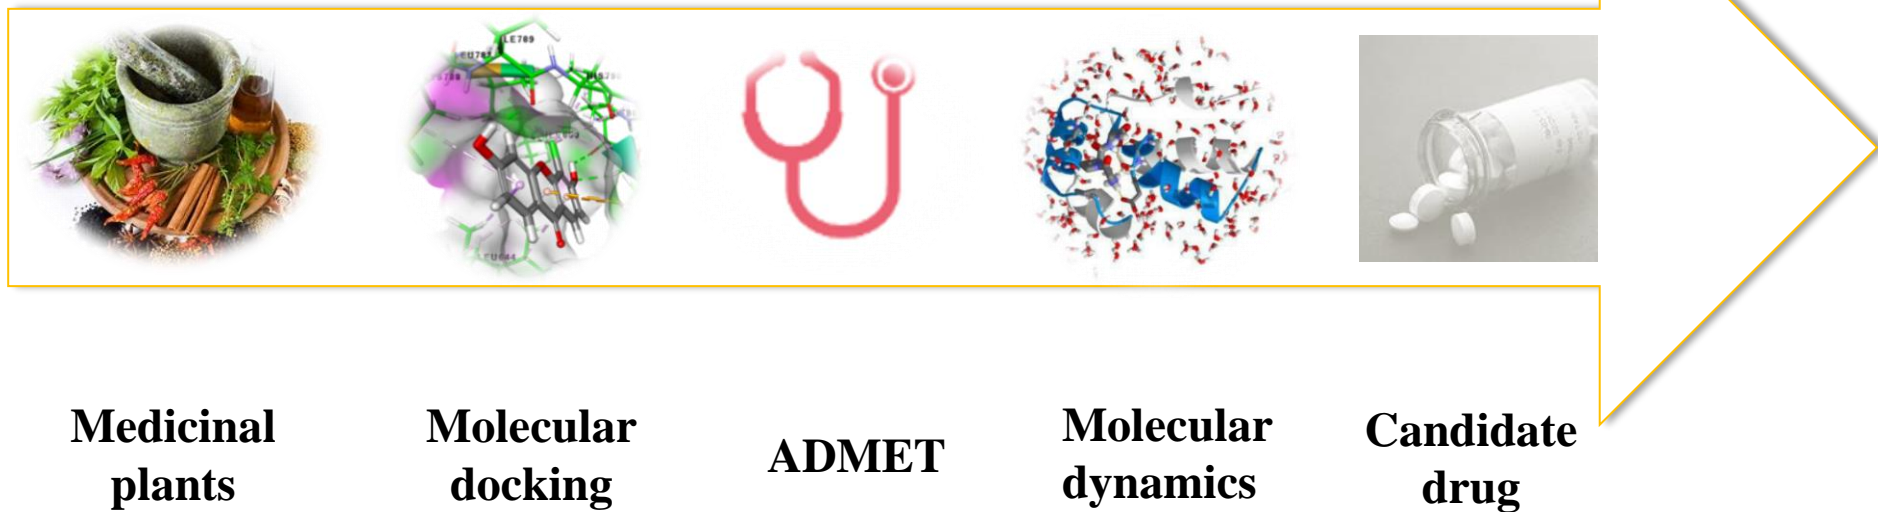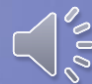

## **Abstract:**

The fast spread of deadly viruses like SARS-CoV-2 and the ineffectiveness of the available vaccinations push us to look for alternative medications that can stop the development of like SARS-CoV-2 cases around the world. Moroccan traditional medicine may hold the key, given how well it treats even the most prevalent local illnesses. For this reason, a virtual screening was conducted on a collection of phytoconstituents from Moroccan medicinal plants in order to identify any potential inhibitors of SARS-CoV-2 activity.

Molecular docking of studied compounds was done in the active site of 6lu7 and 6m0j proteins to assess their binding affinity towards the target proteins. The structural stability of the target protein models was validated by redocking of ACE2 and N3 ligands in the active pockets of 6m0J and 6lu7 receptors. The compounds with good values of binding affinity were further subjected to Lipinski's rule of five, chemical absorption and toxicity analysis to gain insight into their oral bioavailability and safety. The molecular dynamics results in this computational analysis to support the optimum stability of the complex obtained.

**Keywords:** ADMET; Drugs; Medicinal plants; Molecular Docking; SARS-CoV-2;

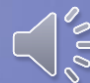

The image shows several spherical SARS-CoV-2 virus particles with characteristic surface spikes, rendered in a vibrant red color against a dark, glowing background. The particles are scattered across the frame, with one large, detailed particle on the left and several smaller ones in the background and foreground.

# SARS-CoV-2

As known in the worldwide, the SARS-CoV-2 is an infectious virus has got its start in Wuhan and has spread over the rest of the world. The rapid progress of COVID19 cases occurred the WHO to announce a global health emergency.

Considering the rapid proliferation SARS-CoV-2 and survival are dependent on the replication process, it's critical to discover a strategy to stop the progression of virus replication.

**ECMC  
2022**

**The 8th International Electronic  
Conference on Medicinal Chemistry**  
01-30 NOVEMBER 2022 | ONLINE

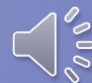

# Introduction

A deep research was done in the previous literature to collect the phytoconstituents of Moroccan plants used in traditional medicine.

To determine that it has the ability to inhibit the SARS-CoV-2 activity, the virtual screening was done by using molecular docking study where we define the stability of the complex formed between the studied ligands and protein.

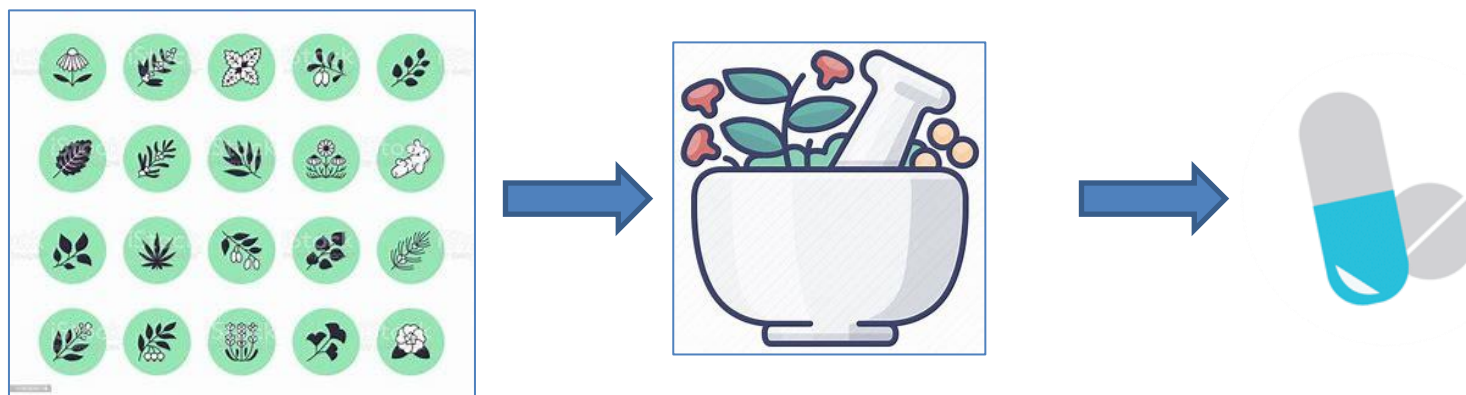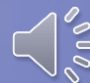

## Drug design

**Drug** is a chemical substance used in the treatment, cure, prevention, or diagnosis of disease enhance physical or mental well-being.

**Drug design (traditional):** trial and error as molecular mechanisms of disease not known.

Cost and time consuming, laborious.

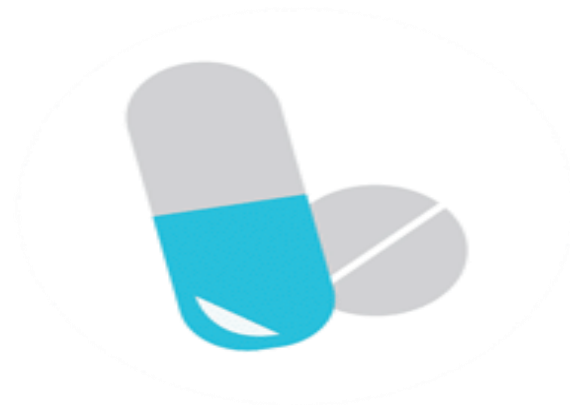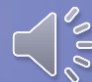

# Computer-assisted drug design (CADD)

**CADD is divided into two strategies:**

## **Ligand-based:**

- Is about finding ligands for a given target.
- A large number of potential ligand molecules are screened.
- It saves synthetic effort to obtain new hit/lead compounds.

## **Structure-based:**

- Relies on knowledge of the three dimensional structure of the biological target obtained through:
  1. X-ray crystallography
  2. Nuclear magnetic resonance (NMR) spectroscopy.

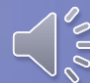

# Computer assisted drug-design

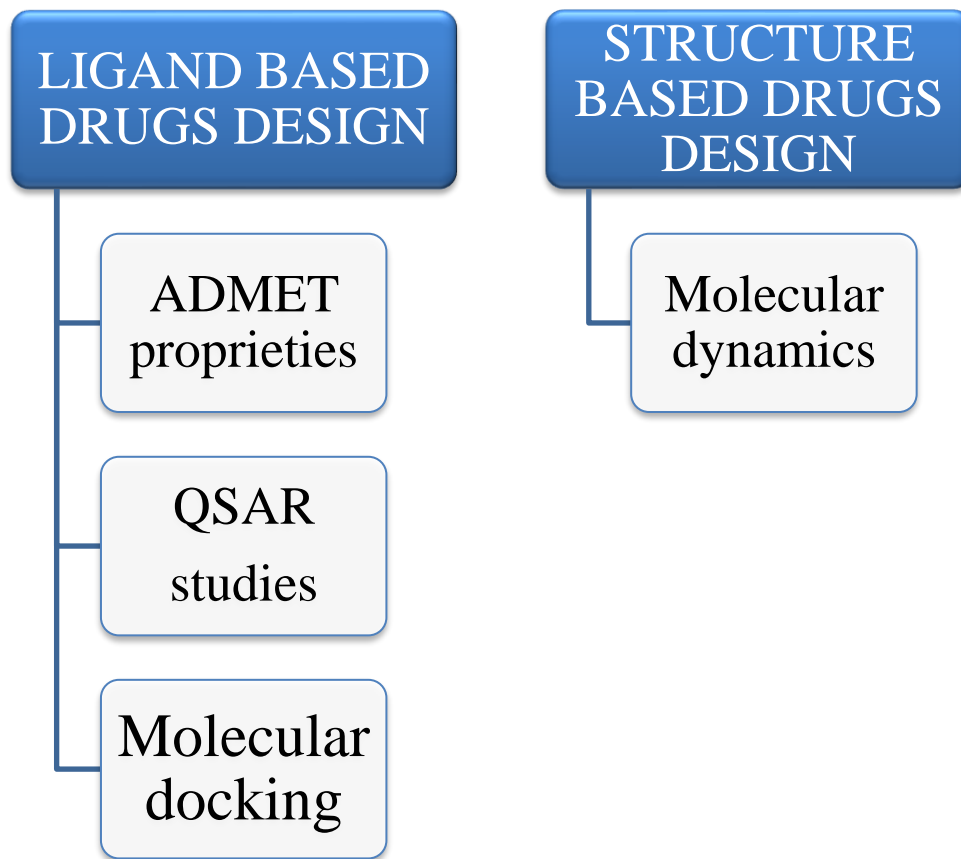



# **Material and methods**

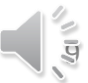

## Database

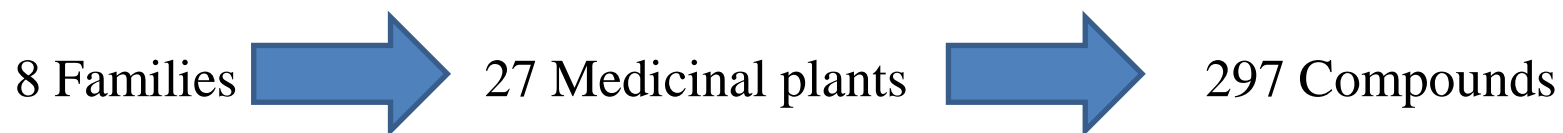

The database was formed after a deep research in previous works, where we collected the phytoconstituents of Moroccan plants used in traditional medicine. The chosen plants were listed in following table:

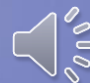

|                  | Plants                    | Family               | Plants               | Family               | Plants                       |
|------------------|---------------------------|----------------------|----------------------|----------------------|------------------------------|
| <i>Lamiaceae</i> | Mentha pulegium           | <i>Apiaceae</i>      | Foeniculum vulgare   | <i>Myrtaceae</i>     | Syzygium aromaticum          |
|                  | Lavandula angustifolia    |                      | Ammi visnaga         |                      | Eucalyptus globulus          |
|                  | Origanum compactum        |                      | Pimpinella anisum    |                      | Myrtus communis              |
|                  | Majorana hortensis moench | <i>Fabaceae</i>      | Cassia absus         | <i>Lauraceae</i>     | Cinnamomum burmanni          |
|                  | Rosmarinus officinalis    |                      | Acacia raddiana      |                      | Laurus nobilis               |
|                  | Teucrium polium           |                      | Glycyrrhiza glabra   | <i>Zingiberoside</i> | Alpinia officinarum<br>hance |
|                  | Mentha spicata            | Artemisia herba alba | Curcuma longa        |                      |                              |
|                  | Salvia officinalis        | <i>Asteraceae</i>    | Matricaria camomilla | <i>Rosaceae</i>      | Malus domestica              |
|                  | Marrubium vulgare         |                      | Anacyclus pyrethrum  |                      | Rosa damascena               |

# Molecular docking

Molecular docking is a method that predicts the preferred orientation of a molecule in a second when it is linked to each other to form a stable complex.

Knowledge of the preferred orientation, in turn, can be used to predict the binding force or affinity between two molecules.

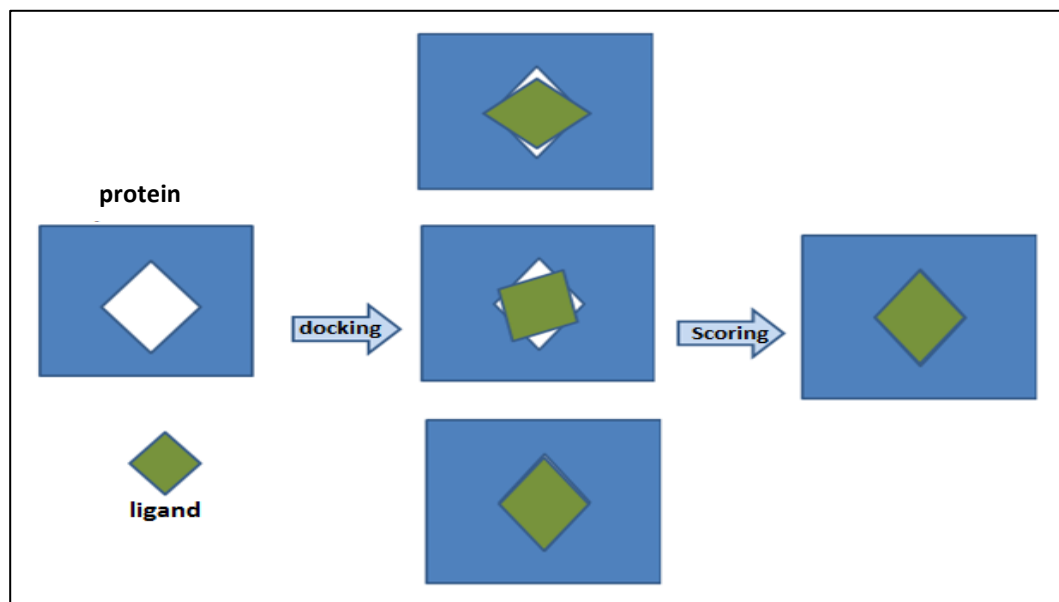

A target is a structure that generally consists of a protein and comprises the active site.

A ligand is a structure that binds to a liaison site, often a tiny molecule.

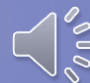

## Molecular docking

We conducted molecular docking analysis of the candidates ligand with SARS-CoV-2 main protease (coded PDB ID: 6lu7) and spike protein (coded PDB ID: 6m0j), which represents potential therapeutic targets for the inhibition of SARS-CoV-2 replication.

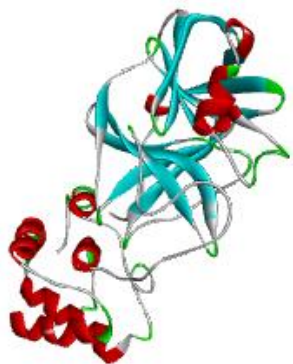

**6lu7**

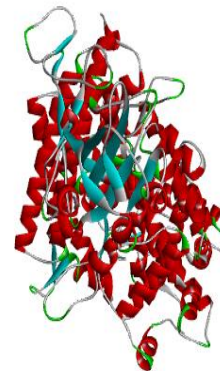

**6m0j**

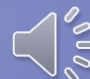

## ADME/Tox proprieties

ADME/Tox properties are important parameters for the selection of drug candidates to develop and investigate the level and kinetics of drug exposure to the tissues and hence influences the performance and pharmacological activity of the compound as a drug:

- Absorption
- Distribution
- Metabolism
- Excretion
- Toxicity

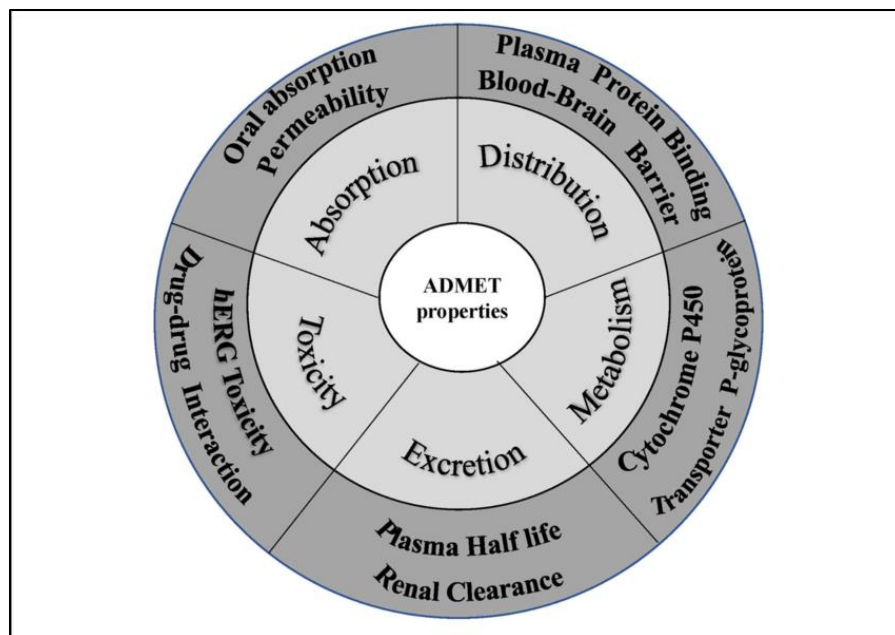

# Molecular dynamics

Molecular dynamics is a computer simulation method for studying the physical movements of atoms and molecules and is thus a type of N-body simulation. Molecular dynamics simulation relies on a robust rule of nature: Newton's Second Law of Motion, where the force equals mass multiplied by acceleration helps predict how the particles move.

The particles in the simulation will interact by two potential function terms:

- The force field in chemistry and biology.
- Interatomic potential in materials physics.

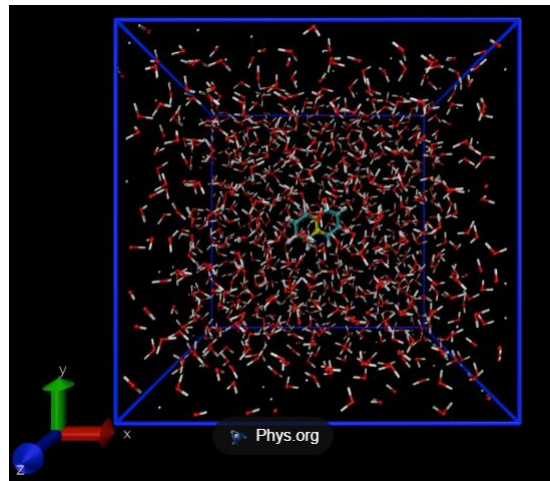

# Results and discussion



The database (297 ligands) and the two studied proteins were prepared and downloaded as PDBQT format. AutoDockTools-1.5.6 was used to configure the coordinate grid box of the docking and the molecular docking simulations was perform using Autodock 4.

| 6lu7 receptor |       |           |       |           |       | 6m0j receptor |       |
|---------------|-------|-----------|-------|-----------|-------|---------------|-------|
| Compounds     | Score | Compounds | Score | Compounds | Score | Compounds     | Score |
| 24            | -8.1  | 108       | -8    | 200       | -7.4  | 109           | -7    |
| 26            | -7.6  | 109       | -8.1  | 221       | -7.8  | 126           | -7.9  |
| 32            | -8.7  | 123       | -7    | 233       | -7    | 139           | -7.1  |
| 36            | -7.8  | 126       | -9.4  | 234       | -7.7  | 143           | -7.5  |
| 37            | -7.8  | 139       | -7.6  | 241       | -9.2  | 144           | -7.2  |
| 44            | -8.5  | 140       | -8.1  | 245       | -7.3  | 177           | -7.1  |
| 45            | -9    | 143       | -8.3  | 248       | -7.4  | 189           | -7.2  |
| 50            | -7.6  | 148       | -8.4  | 249       | -7.2  | 221           | -7.4  |
| 52            | -7.3  | 154       | -7.1  | 250       | -8.3  | 24            | -7.1  |
| 60            | -7.3  | 164       | -7.3  | 253       | -7.5  | 241           | -7.1  |
| 62            | -7    | 166       | -8.2  | 257       | -7.7  | 270           | -8.2  |
| 66            | -7.3  | 167       | -7.2  | 260       | -8.1  | 312           | -7.7  |
| 73            | -7.3  | 176       | -7.9  | 268       | -7    | 32            | -7.6  |
| 75            | -7.2  | 177       | -7.5  | 270       | -8.6  | 323           | -7.9  |
| 86            | -8.4  | 178       | -7.4  | 312       | -8    | 50            | -8.3  |
| 97            | -7    | 189       | -7.2  | 323       | -7.6  | 86            | -7.4  |
| 101           | -7.2  | 190       | -7.1  | 339       | -8.4  | -             | -     |



## Lipinski's and veber's rules

- Molecular weight ( $MW \leq 500$  Da),
- Number of hydrogen bond acceptor ( $HBA \leq 10$ ),
- Number of hydrogen bond donor ( $HBD \leq 5$ ),
- Octane-water partition coefficient ( $\log P \leq 5$ ),
- Rotatable bonds ( $RB \leq 5$ ), Polar surface area ( $PSA \leq 140 \text{ \AA}$ )

| Lipinski's rule |                  |         |              |                 | Veber's rules   |         |
|-----------------|------------------|---------|--------------|-----------------|-----------------|---------|
| N               | Molecular Weight | LogP    | Donors (HBD) | Acceptors (HBA) | Rotatable Bonds | PSA (Å) |
| 26              | 340.284          | -1.3227 | 5            | 9               | 3               | 134.461 |
| 123             | 302.282          | 2.1709  | 3            | 6               | 2               | 125.714 |
| 164             | 300.266          | 2.5854  | 3            | 6               | 2               | 123.998 |
| 178             | 286.239          | 2.2824  | 4            | 6               | 1               | 117.313 |
| 245             | 302.238          | 1.988   | 5            | 7               | 1               | 122.108 |
| 36              | 270.24           | 2.5768  | 3            | 5               | 1               | 112.519 |
| 249             | 300.266          | 2.5854  | 3            | 6               | 2               | 123.998 |
| 248             | 316.265          | 2.291   | 4            | 7               | 2               | 128.792 |
| 233             | 274.272          | 2.3245  | 4            | 5               | 4               | 114.922 |
| 154             | 274.272          | 2.2029  | 3            | 5               | 4               | 115.241 |
| 140             | 324.376          | 4.0007  | 2            | 4               | 1               | 140.522 |

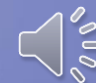

# Absorption and toxicity

| Cpd | AMES toxicity | Max. tolerated dose (human) | hERG I inhibitor | hERG II inhibitor | Hepatotoxicity | Skin Sensitization | Minnow toxicity |
|-----|---------------|-----------------------------|------------------|-------------------|----------------|--------------------|-----------------|
| 26  | No            | 0.32                        | No               | No                | Yes            | No                 | 2.501           |
| 36  | No            | 0.713                       | No               | Yes               | No             | No                 | 0.95            |
| 123 | No            | -0.132                      | No               | No                | No             | No                 | 1.59            |
| 140 | Yes           | -0.238                      | No               | Yes               | No             | No                 | 0.06            |
| 154 | No            | -0.044                      | No               | No                | No             | No                 | 1.04            |
| 164 | No            | 0.896                       | No               | No                | No             | No                 | 0.576           |
| 178 | No            | 0.801                       | No               | Yes               | No             | No                 | 1.545           |
| 233 | No            | 0.346                       | No               | No                | No             | No                 | -0.041          |
| 245 | No            | 0.742                       | No               | No                | No             | No                 | 1.999           |
| 248 | Yes           | 0.727                       | No               | Yes               | No             | No                 | 1.397           |
| 249 | No            | 0.539                       | No               | Yes               | No             | No                 | 1.353           |

| N                             | 164    | 154    |
|-------------------------------|--------|--------|
| Caco-2 permeability           | 1.273  | 1.139  |
| Intestinal absorption (human) | 80.538 | 89.092 |
| Skin permeability             | -2.735 | -3.139 |
| P-glycoprotein substrate      | Yes    | Yes    |
| P-glycoprotein I inhibitor    | No     | No     |
| P-glycoprotein II inhibitor   | No     | No     |

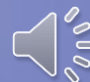

# Molecular dynamics

The obtained results highlight that the molecular recognition of L154 and 6lu7 lead to a stable complex.

| Complex         | RMSD (nm)    | RMSF (nm)    | ROG (nm)     | SASA (nm <sup>2</sup> ) |
|-----------------|--------------|--------------|--------------|-------------------------|
| <b>6LU7</b>     | <b>0.230</b> | <b>0.117</b> | <b>2.247</b> | <b>151.984</b>          |
| <b>6LU7-154</b> | <b>0.283</b> | <b>0.142</b> | <b>2.245</b> | <b>151.354</b>          |
| <b>6LU7-164</b> | <b>0.341</b> | <b>0.255</b> | <b>2.278</b> | <b>153.866</b>          |

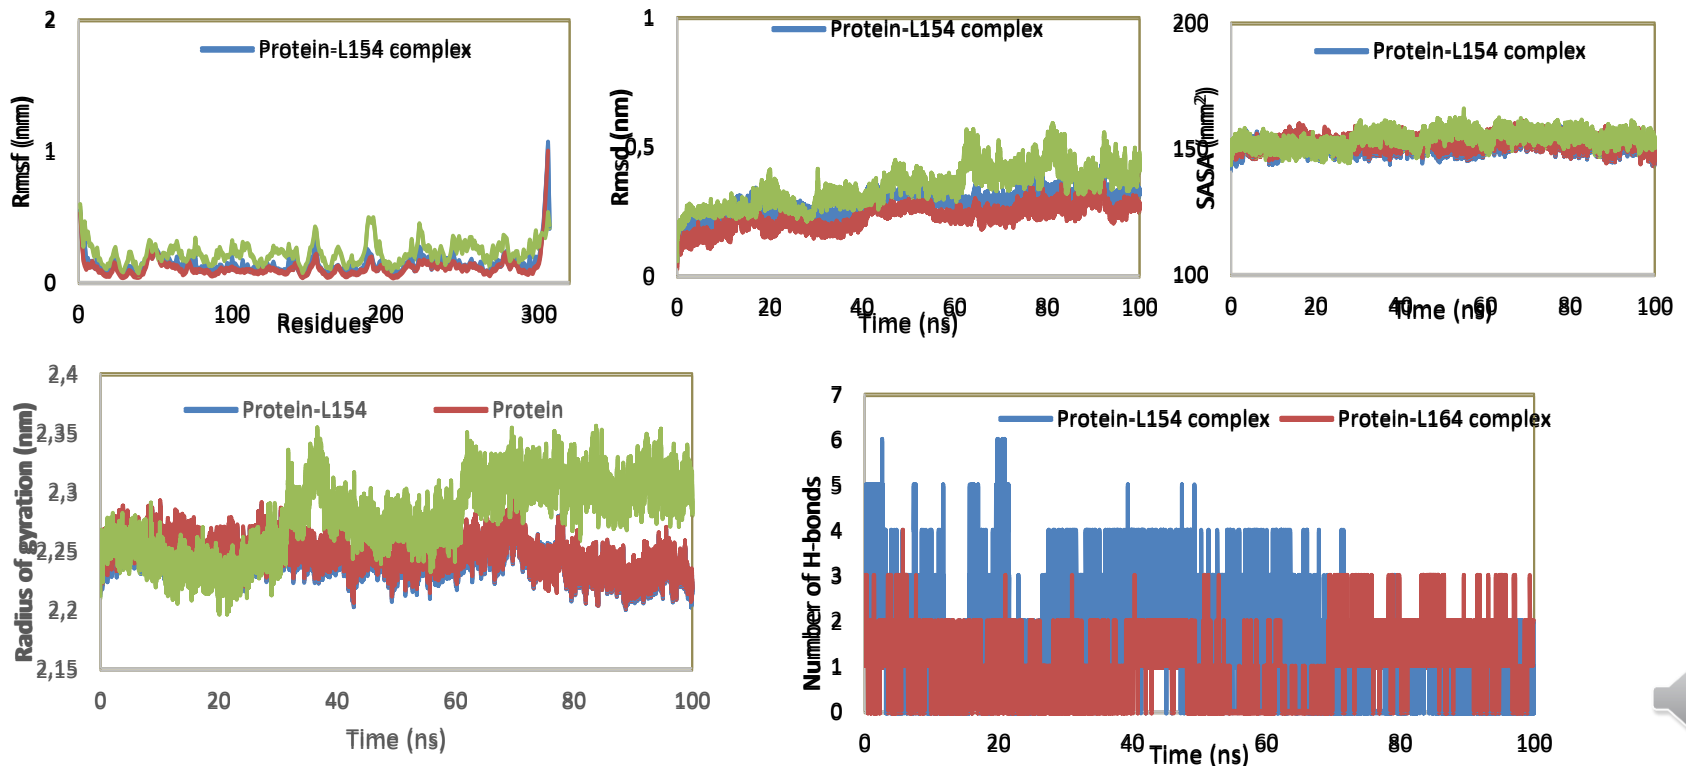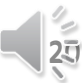

## Conclusion

The virtual screening of a set of 297 compounds extracted from 27 Moroccan plants used in traditional medicine by using the ADMET , molecular dynamics and docking methods to predict the molecules that can be used as a drug and with no side effect, the results suggested 3 molecules that could form a stable complex with SARS-CoV-2, Adding to their good predicted pharmacokinetics properties. Finally the molecular dynamics method supported the optimum stability of the complex obtained.

In vitro, then in vivo study may confirm the obtained results.

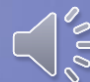

Supplement: s1 [file s1]
